# Supplementary material for: Rhizosphere Ventilation Effects on Root Development and Bacterial Diversity of Peanut in Compacted Soil
Source: MDPI journal article supplement (doi:10.3390/plants13060790), 2024-03-11
Supplement: s1 [file s1]

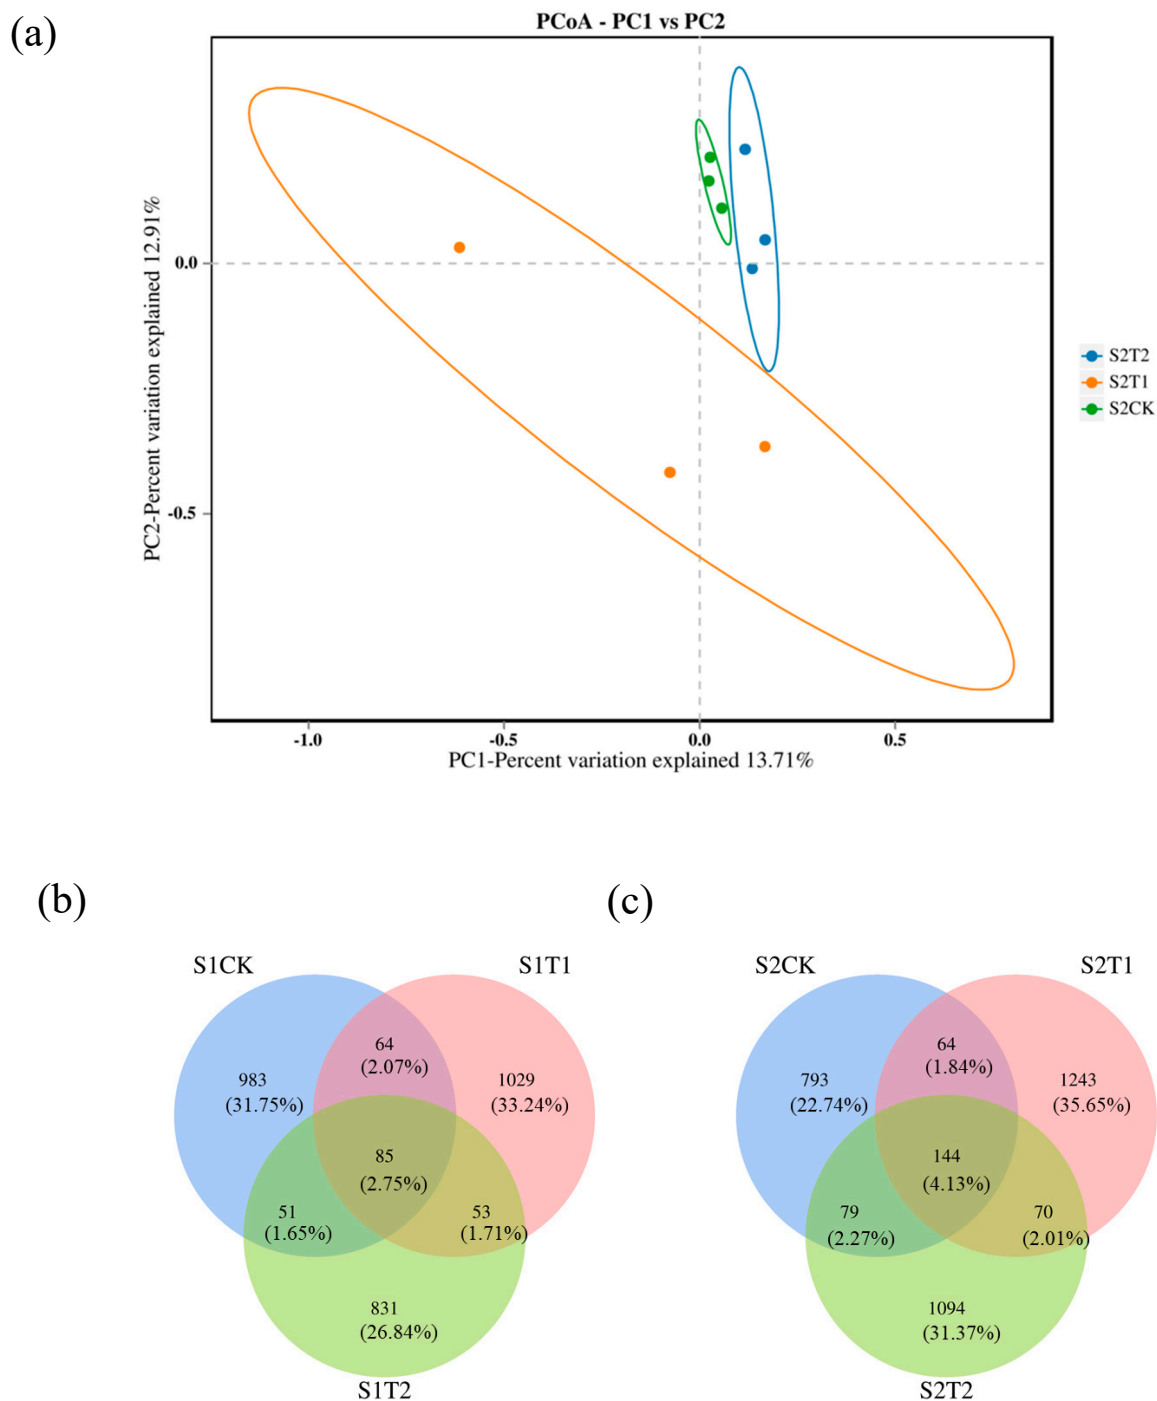

**Figure S1** Principal coordinate analysis (PCoA) plot derived from unweighted Unifrac distances metrics of nitrogen-fixing bacterial communities (a). Venn diagrams display the shared and specific ASVs among the ventilation treatments in the growth stage of (b) antheses, (c) podding. CK, no ventilation; T1 the ventilation volume is 1.2 times as the standard; T2, the ventilation volume is 1.5 times as the standard; S1, anthesis stage; S2, podding stage.

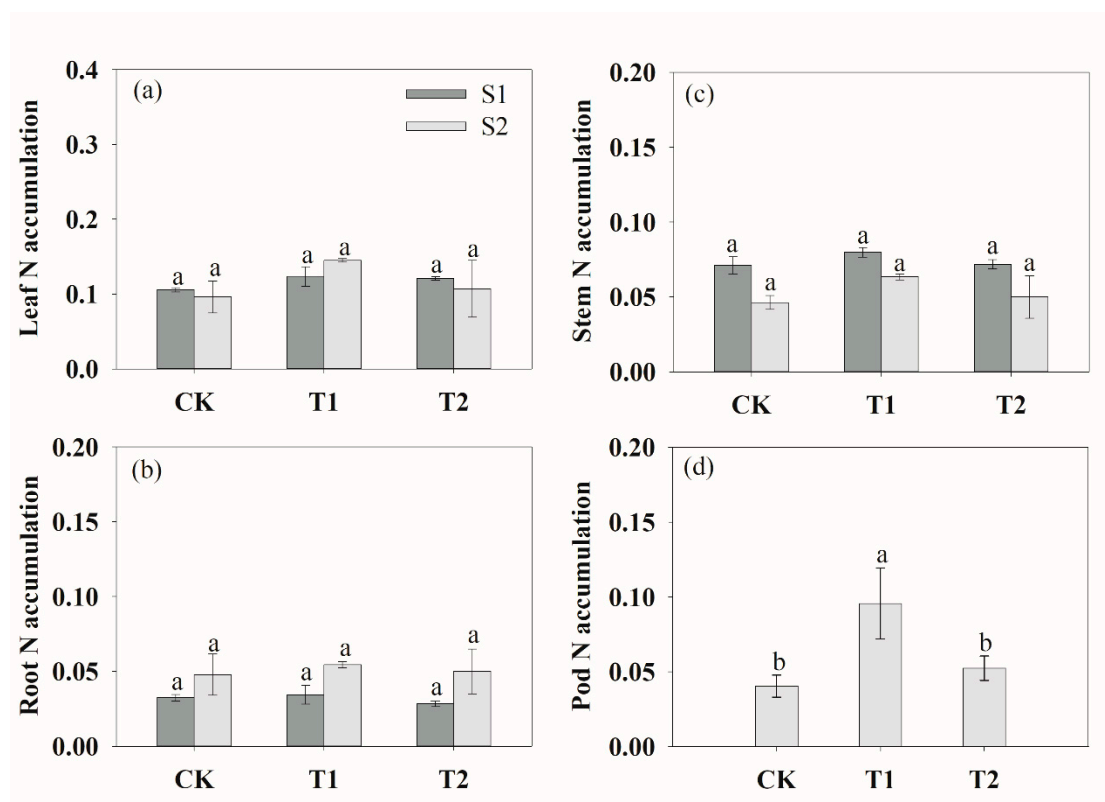

**Figure S2** Effects of rhizosphere ventilation on N accumulation of peanut organs under soil compacted conditions. Leaf N (a), stem N (b), root N (c), pod N (d). CK, no ventilation; T1 the ventilation volume is 1.2 time as the standard; T2, the ventilation volume is 1.5 times as the standard; S1, anthesis stage and S2, podding stage. Different letters above the bars indicate a significant difference at  $p < 0.05$  level.

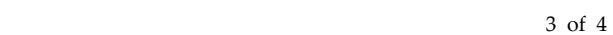

**Figure S3** Circos diagram represents the bacterial composition of top genus level under different ventilation conditions.

**Table S1** Effects of different ventilation treatments on soil physicochemical properties.

| Treatment | AN (mg/kg DW soil) | AP (mg/kg) | AK (mg/kg) |
|-----------|--------------------|------------|------------|
| S1CK      | 6.77a              | 23.16a     | 25.49a     |
| S1T1      | 6.77a              | 22.77a     | 27.46a     |
| S1T2      | 6.94a              | 22.44a     | 26.13a     |
| S2CK      | 6.65b              | 19.60b     | 24.58c     |
| S2T1      | 7.70a              | 21.49a     | 32.54a     |
| S2T2      | 6.65b              | 20.00ab    | 29.49b     |

Abbreviations: S1, peanut growing stage of anthesis; S2, peanut growing stage of podding; CK, no aeration; T1, the ventilation volume is 1.2 times as the standard; T2, the ventilation volume is 1.5 times as the standard. AN, available nitrogen; AP, available phosphorus; AK, available potassium. The values with the same letter between treatments or columns are not significant differences tested by Fisher's test at  $P < 5\%$ .
